# Supplementary material
Source: PubMed Central journal article supplement (PMC2683073)
Supplement: 0902104106_0902104106SI.pdf [file 0902104106_0902104106SI.pdf]

# Supporting Information

Lou et al. 10.1073/pnas.0902104106

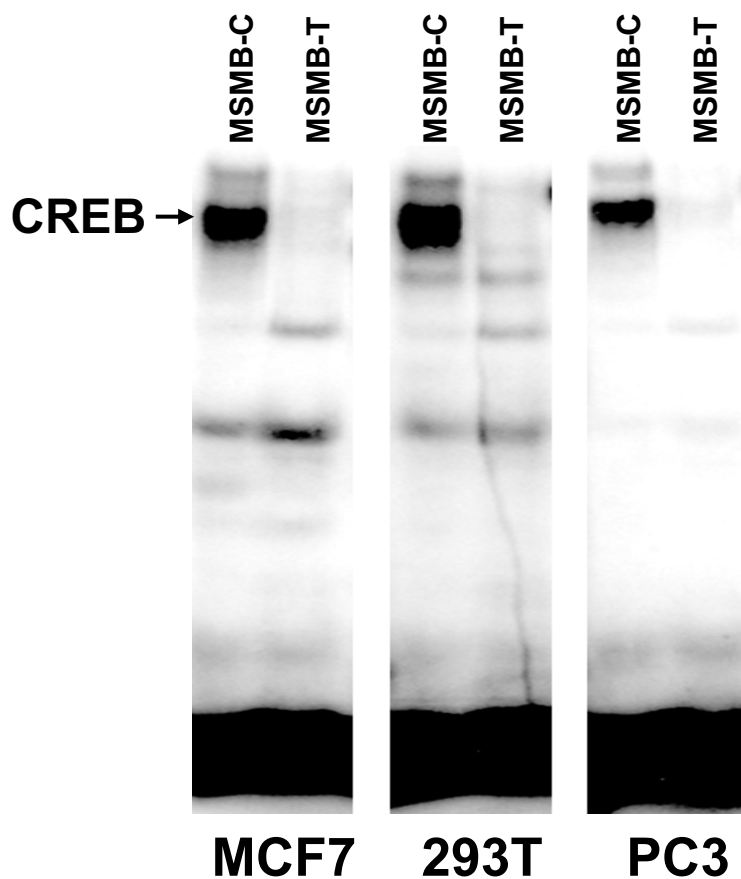

**Fig. S1.** Electrophoretic mobility shift assay analysis performed on MCF7, 293T, and PC3 nuclear extracts corresponding to the CREB binding site of the *MSMB* promoter.

**Table S1. Quality control measures for *MSMB* SNPs**

| Locus      | CPS-II     |              | ATBC study |              | CeRePP study |              | HPFS       |              | PHS        |              |
|------------|------------|--------------|------------|--------------|--------------|--------------|------------|--------------|------------|--------------|
|            | Completion | HWP <i>P</i> | Completion | HWP <i>P</i> | Completion   | HWP <i>P</i> | Completion | HWP <i>P</i> | Completion | HWP <i>P</i> |
| rs11004422 | 92.97      | 0.46         | 93.30      | 0.72         | —            | —            | 97.80      | 0.17         | 99.32      | 0.85         |
| rs7071471  | 88.97      | 0.65         | 93.35      | 0.66         | —            | —            | 95.60      | 0.19         | 97.19      | 0.07         |
| rs11593319 | 89.61      | 0.09         | 91.39      | 0.60         | —            | —            | 94.95      | 0.04         | 97.30      | 0.04         |
| rs10826075 | 87.47      | 0.74         | 92.82      | 1.00         | —            | —            | 94.21      | 0.71         | 97.14      | 0.00         |
| rs4630240  | 88.22      | 0.92         | 93.14      | 0.01         | —            | —            | 95.19      | 0.31         | 92.00      | 0.52         |
| rs11006207 | 97.86      | 0.31         | 99.73      | 0.78         | 99.77        | 0.50         | 99.92      | 0.63         | 99.84      | 0.56         |
| rs10826223 | 99.06      | 0.89         | 99.89      | 0.27         | 99.92        | 0.06         | 98.37      | 0.67         | 95.63      | 0.00         |
| rs10993994 | 99.00      | 0.76         | 99.95      | 0.61         | 99.85        | 0.43         | 98.86      | 0.87         | 96.47      | 0.05         |
| rs7076948  | 89.80      | 0.42         | 93.41      | 0.55         | —            | —            | 95.03      | 0.86         | 97.77      | 0.06         |
| rs10994470 | 90.36      | 0.53         | 93.78      | 1.00         | —            | —            | 95.68      | 1.00         | 98.39      | 0.22         |
| rs7904463  | 98.64      | 0.23         | 99.68      | 0.27         | 95.51        | 0.37         | 97.72      | 0.71         | 96.67      | 0.00         |
| rs17178655 | 88.94      | 0.51         | 93.25      | 0.60         | —            | —            | 95.68      | 1.00         | 95.27      | 0.00         |
| rs10994675 | 99.17      | 0.12         | 100.00     | 0.25         | 99.62        | 0.45         | 100.00     | 0.33         | 95.95      | 0.00         |



Table S3. Association results per study

| Locus                   | Alleles | MAF  | Subjects    | Dichotomous |          | df | Het OR | 95% CI      | Hom OR | 95% CI       |
|-------------------------|---------|------|-------------|-------------|----------|----|--------|-------------|--------|--------------|
|                         |         |      |             | $\chi^2$    | P        |    |        |             |        |              |
| American Cancer Society |         |      |             |             |          |    |        |             |        |              |
| rs11004422              | T, C    | 0.49 | 1,651 1,640 | 9.23        | 0.0099   | 2  | 1.04   | (0.88–1.24) | 1.31   | (1.08–1.59)  |
| rs7071471               | C, T    | 0.47 | 1,573 1,583 | 16.96       | 2.07E-04 | 2  | 1.18   | (1.00–1.40) | 1.51   | (1.24–1.85)  |
| rs11593319              | G, T    | 0.06 | 1,587 1,590 | 1.03        | 0.5980   | 2  | 0.96   | (0.77–1.20) | 0.63   | (0.24–1.63)  |
| rs10826075              | C, G    | 0.27 | 1,551 1,551 | 4.89        | 0.0866   | 2  | 1.10   | (0.95–1.27) | 1.35   | (1.01–1.79)  |
| rs4630240               | C, T    | 0.38 | 1,561 1,568 | 10.79       | 0.0045   | 2  | 0.92   | (0.79–1.07) | 0.69   | (0.55–0.86)  |
| rs11006207              | C, T    | 0.48 | 1,749 1,721 | 25.09       | 3.56E-06 | 2  | 1.16   | (0.99–1.36) | 1.61   | (1.33–1.95)  |
| rs10826223              | G, A    | 0.09 | 1,763 1,761 | 1.63        | 0.4419   | 2  | 0.93   | (0.78–1.11) | 0.67   | (0.31–1.44)  |
| rs10993994              | C, T    | 0.42 | 1,760 1,757 | 44.12       | 2.63E-10 | 2  | 1.31   | (1.12–1.52) | 1.94   | (1.59–2.36)  |
| rs7076948               | T, C    | 0.38 | 1,593 1,591 | 5.53        | 0.0629   | 2  | 1.05   | (0.90–1.22) | 1.29   | (1.04–1.60)  |
| rs10994470              | G, A    | 0.04 | 1,601 1,602 | 1.54        | 0.2145   | 1  | 0.85   | (0.66–1.10) | 0.72   | (0.43–1.21)  |
| rs7904463               | C, T    | 0.33 | 1,752 1,753 | 3.37        | 0.1856   | 2  | 1.11   | (0.96–1.28) | 1.19   | (0.95–1.48)  |
| rs17178655              | G, A    | 0.23 | 1,573 1,582 | 0.84        | 0.6573   | 2  | 1.07   | (0.92–1.24) | 1.07   | (0.78–1.47)  |
| rs10994675              | G, A    | 0.43 | 1,767 1,756 | 10.00       | 0.0067   | 2  | 1.22   | (1.05–1.42) | 1.30   | (1.07–1.57)  |
| ATBC study              |         |      |             |             |          |    |        |             |        |              |
| rs11004422              | T, C    | 0.42 | 846 879     | 4.05        | 0.1322   | 2  | 1.05   | (0.85–1.30) | 1.32   | (1.00–1.74)  |
| rs7071471               | C, T    | 0.39 | 850 875     | 3.75        | 0.1537   | 2  | 1.07   | (0.87–1.32) | 1.32   | (1.00–1.76)  |
| rs11593319              | G, T    | 0.10 | 829 860     | 6.46        | 0.0395   | 2  | 0.74   | (0.58–0.96) | 1.50   | (1.04–3.64)  |
| rs10826075              | C, G    | 0.20 | 842 873     | 0.52        | 0.7705   | 2  | 1.08   | (0.88–1.32) | 0.97   | (0.58–1.63)  |
| rs4630240               | C, T    | 0.43 | 848 873     | 7.90        | 0.0192   | 2  | 0.74   | (0.60–0.92) | 0.90   | (0.68–1.19)  |
| rs11006207              | C, T    | 0.39 | 918 928     | 3.70        | 0.1569   | 2  | 1.09   | (0.89–1.33) | 1.31   | (0.99–1.73)  |
| rs10826223              | G, A    | 0.13 | 920 928     | 3.16        | 0.2064   | 2  | 0.82   | (0.65–1.02) | 0.93   | (0.50–1.73)  |
| rs10993994              | C, T    | 0.36 | 921 928     | 5.96        | 0.0508   | 2  | 1.14   | (0.94–1.39) | 1.42   | (1.07–1.89)  |
| rs7076948               | T, C    | 0.34 | 850 876     | 0.07        | 0.9633   | 2  | 0.98   | (0.80–1.20) | 1.03   | (0.75–1.41)  |
| rs10994470              | G, A    | 0.03 | 853 880     | 1.35        | 0.2448   | 1  | 0.78   | (0.51–1.19) | 0.61   | (0.26–1.42)  |
| rs7904463               | C, T    | 0.29 | 917 927     | 2.65        | 0.2657   | 2  | 0.90   | (0.74–1.09) | 1.17   | (0.83–1.64)  |
| rs17178655              | G, A    | 0.18 | 848 875     | 6.54        | 0.0379   | 2  | 0.77   | (0.63–0.95) | 0.75   | (0.44–1.28)  |
| rs10994675              | G, A    | 0.36 | 921 929     | 1.98        | 0.3722   | 2  | 1.00   | (0.82–1.22) | 1.21   | (0.91–1.60)  |
| CeRePP study            |         |      |             |             |          |    |        |             |        |              |
| rs11004422              |         |      |             |             |          |    |        |             |        |              |
| rs7071471               |         |      |             |             |          |    |        |             |        |              |
| rs11593319              |         |      |             |             |          |    |        |             |        |              |
| rs10826075              |         |      |             |             |          |    |        |             |        |              |
| rs4630240               |         |      |             |             |          |    |        |             |        |              |
| rs11006207              | C, T    | 0.49 | 655 655     | 1.95        | 0.3779   | 2  | 0.83   | (0.64–1.09) | 0.84   | (0.61–1.16)  |
| rs10826223              | G, A    | 0.07 | 656 656     | 6.78        | 0.0337   | 2  | 1.25   | (0.90–1.73) | 5.04   | (1.08–23.55) |
| rs10993994              | C, T    | 0.43 | 655 656     | 2.06        | 0.3566   | 2  | 0.86   | (0.67–1.10) | 1.02   | (0.75–1.40)  |
| rs7076948               |         |      |             |             |          |    |        |             |        |              |
| rs10994470              |         |      |             |             |          |    |        |             |        |              |
| rs7904463               | C, T    | 0.35 | 627 627     | 4.30        | 0.1164   | 2  | 0.83   | (0.65–1.05) | 0.72   | (0.50–1.03)  |
| rs17178655              |         |      |             |             |          |    |        |             |        |              |
| rs10994675              | G, A    | 0.44 | 654 654     | 3.03        | 0.2197   | 2  | 0.80   | (0.62–1.03) | 0.90   | (0.66–1.23)  |
| HPFS                    |         |      |             |             |          |    |        |             |        |              |
| rs11004422              | T, C    | 0.50 | 600 581     | 8.94        | 0.0114   | 2  | 0.98   | (0.74–1.30) | 1.48   | (1.06–2.07)  |
| rs7071471               | C, T    | 0.47 | 588 565     | 10.65       | 0.0049   | 2  | 0.98   | (0.74–1.29) | 1.58   | (1.13–2.21)  |
| rs11593319              | G, T    | 0.07 | 585 560     | 3.59        | 0.0580   | 1  | 0.72   | (0.51–1.01) | 0.52   | (0.26–1.03)  |
| rs10826075              | C, G    | 0.23 | 583 553     | 4.75        | 0.0932   | 2  | 1.17   | (0.91–1.50) | 1.72   | (0.99–2.99)  |
| rs4630240               | C, T    | 0.38 | 588 561     | 7.73        | 0.0209   | 2  | 0.73   | (0.57–0.94) | 0.67   | (0.47–0.97)  |
| rs11006207              | C, T    | 0.47 | 611 595     | 9.43        | 0.0090   | 2  | 1.11   | (0.85–1.45) | 1.62   | (1.17–2.24)  |
| rs10826223              | G, A    | 0.10 | 611 596     | 0.88        | 0.6437   | 2  | 0.87   | (0.64–1.17) | 1.02   | (0.38–2.76)  |
| rs10993994              | C, T    | 0.42 | 603 590     | 8.59        | 0.0136   | 2  | 1.11   | (0.86–1.44) | 1.64   | (1.17–2.30)  |
| rs7076948               | T, C    | 0.38 | 586 560     | 0.41        | 0.8149   | 2  | 0.97   | (0.75–1.25) | 1.08   | (0.76–1.54)  |
| rs10994470              | G, A    | 0.04 | 589 565     | 2.72        | 0.0990   | 1  | 1.46   | (0.93–2.31) | 2.14   | (0.86–5.34)  |
| rs7904463               | C, T    | 0.33 | 600 579     | 1.96        | 0.3762   | 2  | 0.98   | (0.77–1.25) | 1.28   | (0.87–1.88)  |
| rs17178655              | G, A    | 0.21 | 589 565     | 0.64        | 0.7273   | 2  | 1.02   | (0.80–1.32) | 1.26   | (0.72–2.21)  |
| rs10994675              | G, A    | 0.43 | 611 596     | 1.18        | 0.5555   | 2  | 0.91   | (0.70–1.17) | 1.06   | (0.77–1.46)  |
| PHS                     |         |      |             |             |          |    |        |             |        |              |
| rs11004422              | T, C    | 0.49 | 980 931     | 16.46       | 2.67E-04 | 2  | 1.25   | (1.00–1.56) | 1.68   | (1.30–2.18)  |
| rs7071471               | C, T    | 0.48 | 952 918     | 13.31       | 0.0013   | 2  | 1.11   | (0.89–1.38) | 1.55   | (1.21–1.99)  |
| rs11593319              | G, T    | 0.06 | 958 914     | 4.33        | 0.1146   | 2  | 0.74   | (0.55–1.00) | 0.67   | (0.24–1.89)  |
| rs10826075              | C, G    | 0.28 | 954 915     | 2.06        | 0.3574   | 2  | 1.01   | (0.83–1.23) | 1.25   | (0.92–1.71)  |
| rs4630240               | C, T    | 0.35 | 895 875     | 19.66       | 5.39E-05 | 2  | 0.68   | (0.56–0.83) | 0.58   | (0.43–0.79)  |
| rs11006207              | C, T    | 0.49 | 983 938     | 20.63       | 3.31E-05 | 2  | 1.22   | (0.98–1.51) | 1.78   | (1.38–2.30)  |
| rs10826223              | G, A    | 0.08 | 933 907     | 1.56        | 0.4576   | 2  | 0.98   | (0.74–1.30) | 1.51   | (0.78–2.94)  |
| rs10993994              | C, T    | 0.43 | 950 906     | 21.46       | 2.19E-05 | 2  | 1.26   | (1.02–1.55) | 1.83   | (1.41–2.36)  |
| rs7076948               | T, C    | 0.39 | 959 922     | 4.36        | 0.1129   | 2  | 1.09   | (0.89–1.33) | 1.32   | (1.02–1.72)  |
| rs10994470              | G, A    | 0.04 | 970 923     | 0.43        | 0.5119   | 1  | 0.90   | (0.65–1.24) | 0.81   | (0.42–1.54)  |
| rs7904463               | C, T    | 0.34 | 957 903     | 2.14        | 0.3432   | 2  | 1.11   | (0.91–1.35) | 1.20   | (0.91–1.59)  |
| rs17178655              | G, A    | 0.21 | 934 899     | 6.73        | 0.0345   | 2  | 1.07   | (0.87–1.32) | 0.64   | (0.44–0.93)  |
| rs10994675              | G, A    | 0.43 | 945 901     | 0.38        | 0.8257   | 2  | 1.01   | (0.82–1.25) | 1.08   | (0.84–1.38)  |

Het, heterozygous; Hom, homozygous, OR, odds ratio.
